# Supplementary material for: An age scale for new climate records from Sherman Island, West Antarctica
Source: Copernicus journal article supplement (doi:10.5194/cp-19-1699-2023), 2023-08-17
Supplement: Supplementary file 2 [file cp-19-1699-2023-supplement.zip]

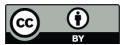

## *Supplement of*

# **An age scale for new climate records from Sherman Island, West Antarctica**

**Isobel Rowell et al.**

*Correspondence to:* Isobel Rowell (iswell@bas.ac.uk)

- cp-19-1699-2023-supplement-title-page.pdf
- supplement
  - S1\_annuallayers\_300523.xlsx
  - S2\_sisotope\_300523.xlsx
  - S3\_agescale\_limited\_300523.xlsx
  - Supplemental\_Information\_300523.pdf

The copyright of individual parts of the supplement might differ from the article licence.
